# Supplementary material for: Gene expression dynamics in input-responsive engineered living materials programmed for bioproduction
Source: PubMed Central journal article supplement — Mater Today Bio. 2023 May 22;20:100677. doi: 10.1016/j.mtbio.2023.100677 (PMC10239009; doi:10.1016/j.mtbio.2023.100677), 2023-05-22
Supplement: mmc1.pdf [file mmc1.pdf]

## **Supplementary Information**

### **Gene expression dynamics in input-responsive engineered living materials programmed for bioproduction**

Widianti Sugianto<sup>1,2,3</sup>, Gokce Altin-Yavuzarslan<sup>2,4</sup>, Benjamin I. Tickman<sup>1,2,3</sup>, Cholpisit Kiattisewee<sup>2,3</sup>, Shuo-Fu Yuan<sup>5</sup>, Sierra M. Brooks<sup>6</sup>, Jitkanya Wong<sup>4</sup>, Hal S. Alper<sup>5,6</sup>, Alshakim Nelson<sup>2,4,\*</sup>, James M. Carothers<sup>1,2,3,\*</sup>

1: Department of Chemical Engineering  
University of Washington  
Seattle, WA 98195  
United States

2: Molecular Engineering & Sciences Institute  
University of Washington  
Seattle, WA 98195  
United States

3: Center for Synthetic Biology  
University of Washington  
Seattle, WA 98195  
United States

4: Department of Chemistry  
University of Washington  
Seattle, WA 98195  
United States

5: Institute for Cellular and Molecular Biology  
University of Texas at Austin  
Austin, TX 78712  
United States

6: McKetta Department of Chemical Engineering  
University of Texas at Austin  
Austin, TX 78712  
United States

\*Corresponding authors.  
[alshakim@uw.edu](mailto:alshakim@uw.edu)

[jcaroth@uw.edu](mailto:jcaroth@uw.edu)

## Supplemental information:

Supplementary Tables

Supplementary Table S1. Plasmids used in this study

| Plasmid or Integrative Cassette | Promoter | Minimal Promoter | CDS      | gRNA | Terminator            | Marker       | Ori      | Description                                                                                                             |
|---------------------------------|----------|------------------|----------|------|-----------------------|--------------|----------|-------------------------------------------------------------------------------------------------------------------------|
| pJF143.J3.J23106.mRFP           | J3       | J23106           | mRFP1    | X    | dbl Term              | Carb         | pSC101** | mRFP1 reporter plasmid (Supplementary Figs. S2 and S3)                                                                  |
| pWS028.J3.J23106.sfGFP          | J3       | J23106           | sfGFP    | X    | dbl Term              | Carb         | pSC101** | sfGFP reporter plasmid (Fig. 1c, Supplementary Fig. S1)                                                                 |
| pCK430                          | X        | X                | Flp      | X    | X                     | Carb/<br>Kan | p15A     | No reporter plasmid, expressing non-fluorescent protein (Fig. 1c)                                                       |
| pBT001-J2:RR2.CM.J23118         | X        | J23118           | sfGFP    | X    | ECK120010<br>818 Term | Carb         | pSC101** | sfGFP reporter plasmid (Fig. 1b)                                                                                        |
|                                 | J2       | J23117           | RR2      |      | TrrnB                 |              |          |                                                                                                                         |
|                                 | J3       |                  | mRFP1    |      | dbl Term              |              |          |                                                                                                                         |
| pCK389.306                      | X        | J23119           | X        | J306 | TrrnB                 | Chlor        | p15A     | Plasmid containing Inducible CRISPRa components, where pTet controls expression of TetR and MCP-SoxS (Figs. 2,3, and 4) |
|                                 |          | Sp. Cas9         | dCas9    | X    | dbl Term              |              |          |                                                                                                                         |
|                                 |          | pTet             | MCP-SoxS | X    | BBa_B102              |              |          |                                                                                                                         |
| pPC003.J3.J23117.GFP            | J3       | J23117           | sfGFP    | X    | dbl Term              | Carb         | pSC101** | sfGFP reporter plasmid (Figs. 2 and 3)                                                                                  |
| pCK014                          | J3       | J23117           | GTPCH    | X    | dbl Term              | Carb         | pSC101** | Multi-gene pathway of Pteridines (Fig. 4)                                                                               |
|                                 |          |                  | PTPS     | X    | dbl Term              |              |          |                                                                                                                         |

|                                                         |                                  |   |                                           |   |          |                                                       |          |                                                                                                                                                                              |
|---------------------------------------------------------|----------------------------------|---|-------------------------------------------|---|----------|-------------------------------------------------------|----------|------------------------------------------------------------------------------------------------------------------------------------------------------------------------------|
| pWS027.J3.dbl Term                                      | J3                               | X | X                                         | X | dbl Term | Carb                                                  | pSC101** | No reporter (no pathway) plasmid (Supplementary Fig. S7)                                                                                                                     |
| PITy3-GAL1-ScPEP4 (integrative cassette)                | pGal1                            | X | ScPEP4                                    | X | tPRM9    | G418 ( <i>S. cerevisiae</i> ), Kan ( <i>E. coli</i> ) | ColE1    | pITy3 backbone (Parekh, R.N., Shaw, M.R. and Wittrup, K.D. <u>Biotechnol Progress</u> , 1996) protease-production plasmid for integration into <i>S. cerevisiae</i> (Fig. 5) |
| P415-UraInt-pCup1-MjDOD-CYP76AD5 (integrative cassette) | pCUP1 (gene 1)<br>pTDH3 (gene 2) | X | Gene 1: MjDOD (T261N)<br>Gene 2: CYP76AD1 | X | tTDH1    | Leu ( <i>S. cerevisiae</i> ), Amp ( <i>E. coli</i> )  | ColE1    | P415 Mumberg Backbone (Mumberg, D. et al. <u>Gene</u> , 1995) betaxanthins-production plasmid for integration into <i>S. cerevisiae</i> (Fig. 5)                             |

**Supplementary Table S2.** Direct-gel measurement parameters (mean expression, standard deviation, and coefficient of variation) for 3mm- and 4mm-diameter hydrogels expressing mRFP1 and sfGFP reporters.

| Time (hr)          | sfGFP (RFU)             |             |             |                         |             |            | mRFP1 (RFU)             |               |             |                         |               |             |
|--------------------|-------------------------|-------------|-------------|-------------------------|-------------|------------|-------------------------|---------------|-------------|-------------------------|---------------|-------------|
|                    | d <sub>gel</sub> = 3 mm |             |             | d <sub>gel</sub> = 4 mm |             |            | d <sub>gel</sub> = 3 mm |               |             | d <sub>gel</sub> = 4 mm |               |             |
|                    | Avg                     | stdev       | C.V. (%)    | Avg                     | stdev       | C.V. (%)   | Avg                     | stdev         | C.V. (%)    | Avg                     | stdev         | C.V. (%)    |
| 0                  | 29.2                    | 1.1         | 3.8         | 37.8                    | 3.3         | 8.7        | 57.6                    | 8.4           | 14.7        | 106.2                   | 16.6          | 15.6        |
| 12                 | 40.8                    | 8.2         | 20.0        | 56.4                    | 5.1         | 9.1        | 102.0                   | 20.5          | 20.1        | 144.2                   | 10.5          | 7.3         |
| 24                 | <b>76.0</b>             | <b>14.8</b> | <b>19.4</b> | <b>130.2</b>            | <b>10.9</b> | <b>8.4</b> | <b>2096.6</b>           | <b>1770.2</b> | <b>84.4</b> | <b>1568.0</b>           | <b>1081.6</b> | <b>69.0</b> |
| 36                 | 88.0                    | 11.7        | 13.3        | 191.2                   | 17.9        | 9.4        | 2313.8                  | 987.5         | 42.7        | 1732.4                  | 835.8         | 48.2        |
| Mean±stdev of C.V. | 14.1 ± 7.6%             |             |             | 8.9 ± 0.4%              |             |            | 40.5 ± 31.7%            |               |             | 35.0 ± 28.7%            |               |             |

### Supplementary Figures

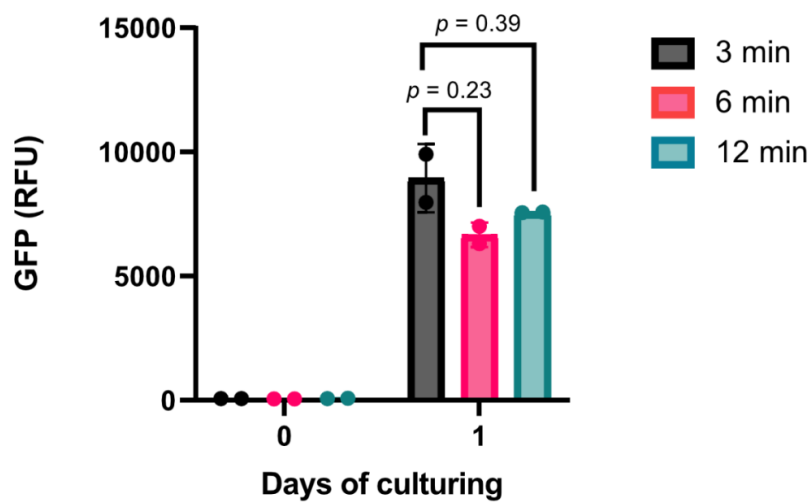

**Supplementary Figure S1.** Effect of UV curing duration on gene expression in ELMs. *E. coli* ELMs (diameter = 4 mm) were fabricated as described in the methods section (Section 2.1.3). ELMs were photocured under a UV 365 nm lamp for a total duration (curing both sides of the mold assembly) of 3, 6, and 12 minutes. The ELMs were cultured in EZ-RDM media as described in the methods section (Section 2.1.3) for 1 day. No significant differences (Student's *t*-test  $p > 0.05$ ) in ELM sfGFP expression were observed among those three UV curing durations. Put another way, neither halving nor doubling the UV curing duration appears to impact ELM gene expression after one day of culturing compared to our standard 6 minute curing condition. Values represent the mean  $\pm$  standard deviation from  $n = 2$  technical replicates.

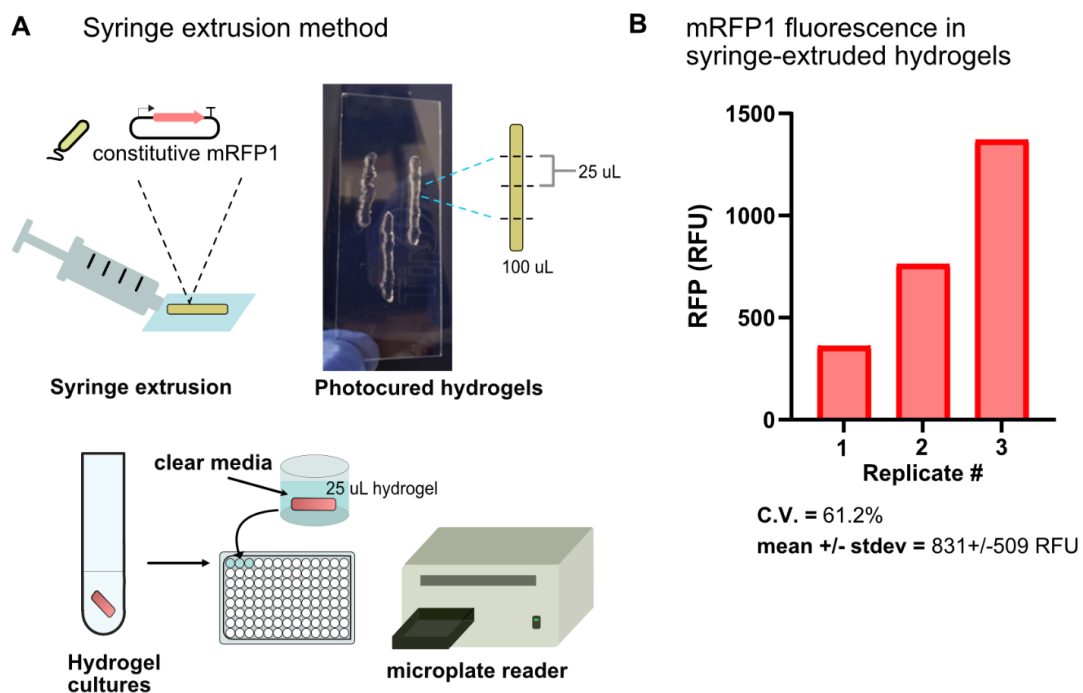

**Supplementary Figure S2.** Direct-gel measurement method for uncast (syringe-extruded) *E. coli*-laden hydrogels. **a)** 100  $\mu$ L syringe-extruded hydrogel was seeded with mRFP1-expressing *E. coli* cells and divided into four equal parts ( $\sim$ 25  $\mu$ L) before culturing in EZ-RDM overnight. Plate reader measurement was conducted after culturing for 24 hours. **b)** Measured hydrogel-derived RFP fluorescence per hydrogel replicate ( $n = 3$  technical replicates).

## Hydrogels measurement

A sfGFP,  $d_{\text{gel}} = 3 \text{ mm}$ 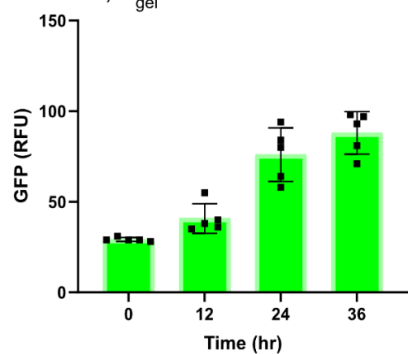B sfGFP,  $d_{\text{gel}} = 4 \text{ mm}$ 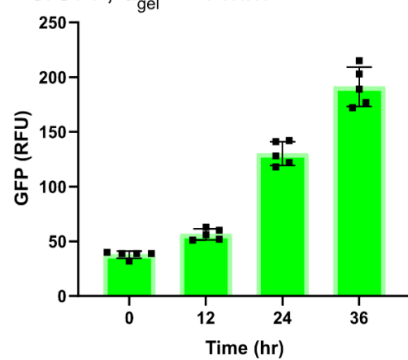C mRFP1,  $d_{\text{gel}} = 3 \text{ mm}$ 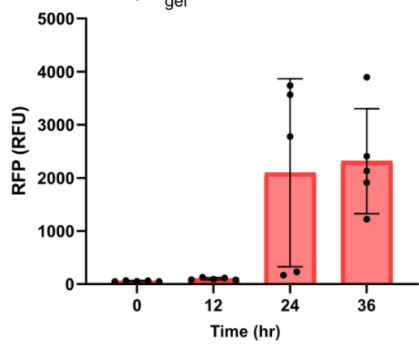D mRFP1,  $d_{\text{gel}} = 4 \text{ mm}$ 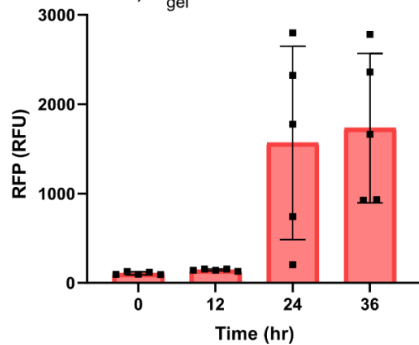

## Surrounding media measurement

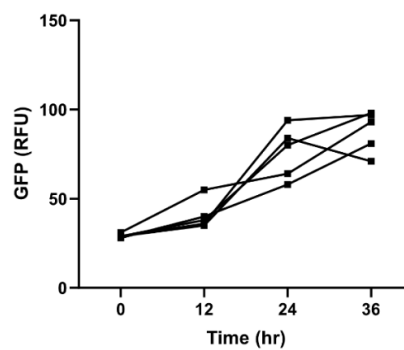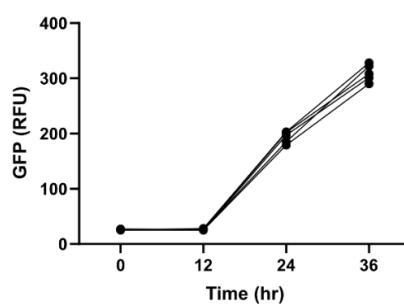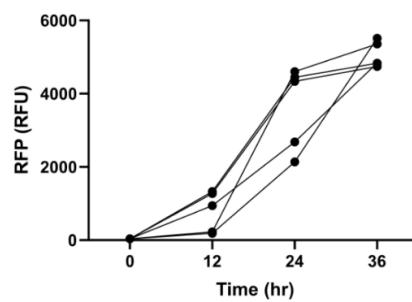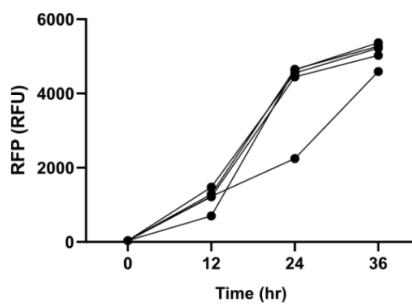

**Supplementary Figure S3.** Direct-gel measurement for cast *E. coli* hydrogels of various diameter and fluorescent reporter combinations. Hydrogel-based fluorescence was measured using workflow depicted in Fig. 1 and reported as relative fluorescence units (RFU). Fluorescence of planktonic cells in surrounding media were also measured using a microplate reader. Values represent the mean  $\pm$  standard deviation from  $n = 5$  technical replicates. **a)** sfGFP, 3-mm diameter gels **b)** sfGFP, 4-mm diameter gels **c)** mRFP1, 3-mm diameter gels **d)** mRFP1, 4-mm diameter gels.

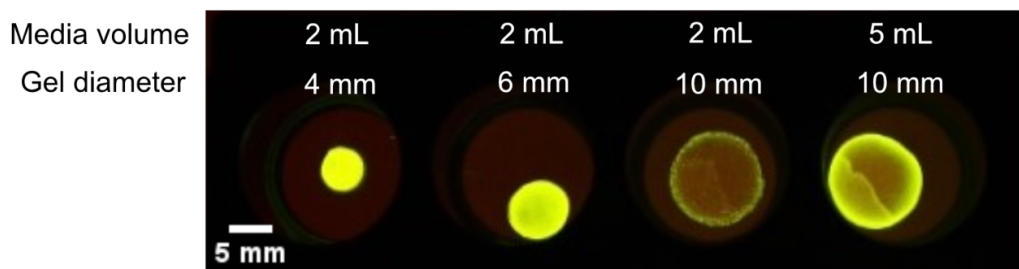

**Supplementary Figure S4.** GFP expression as a function of cast-gel diameter and culture volume. Cylindrical hydrogels (constant height = 2 mm) containing sfGFP-expressing *E. coli* were cast into molds of varying diameters ( $D = 4, 6,$  and  $10$  mm). Surface area-to-volume ratio (SA/V) of the hydrogels was decreased from 2.0 ( $D = 4$  mm), to 1.7 ( $D = 6$  mm), to 1.4 ( $D = 10$  mm). Qualitatively, fluorescence is saturated in hydrogels with larger SA/V ( $D = 4$  and  $6$  mm) cultured for 24 hours in 2 mL of EZ media. Relatively low fluorescence was observed in hydrogels with the smallest SA/V ( $D = 10$  mm) cultured in 2 mL of media. Compared to this condition, increasing the culture volume to 5 mL for the largest ( $D = 10$  mm) hydrogel increased the fluorescence.



**A** Gene expression persistence in ELMs

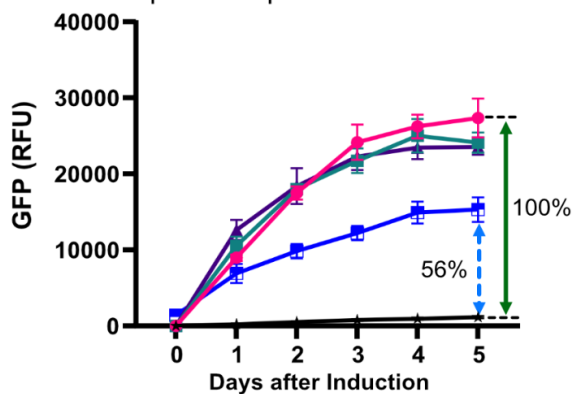

**B** Hydrogel-derived fluorescence of blank (acellular) and -aTc controls

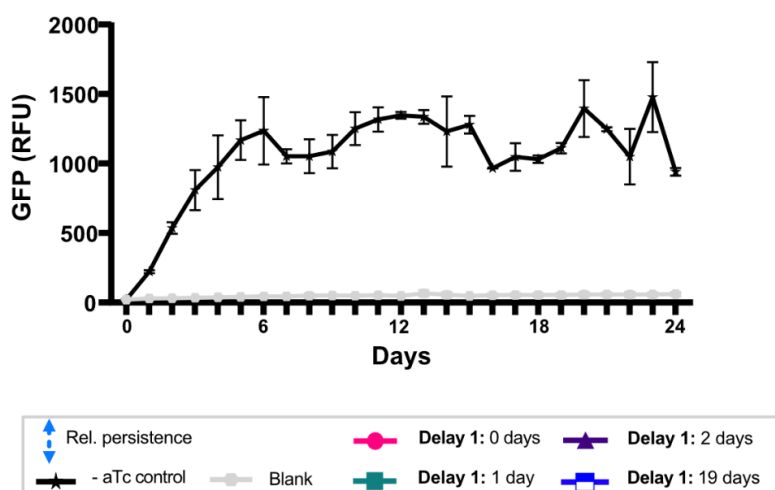

**Supplementary Figure S5.** Dynamic sfGFP expression in *E. coli* ELMs. All values represent mean  $\pm$  standard deviation from  $n = 5$  technical replicates, except for 19-day delay\* and uninduced\*\* samples (\* $n = 3$ , \*\* $n = 2$  technical replicates). **a)** Gene expression persistence throughout 5 days of induction in ELMs, overlaid for all delay periods. **b)** Zoomed-in plot of blank (acellular) and uninduced (no aTc) gels controls for dynamic gene expression experiment (as depicted in Fig. 3b).

**Equation S6.A** Logistic fit for estimating expression level as a function of time

$$E(t) = \frac{E_{max} \times E_0}{E_0 + (E_{max} - E_0) \times e^{-r_1 t}}$$

**Equation S6.B** Rate of gene expression derived from logistic fit

$$R(t) = \frac{A e^{r_2 t}}{(B + e^{r_2 t})^2}$$

| <u>Symbol</u> | <u>Description</u>                                                  | <u>Units</u>      |
|---------------|---------------------------------------------------------------------|-------------------|
| $E(t)$        | Expression level as a function of time                              | RFU               |
| $E_{max}$     | Maximum level                                                       | RFU               |
| $E_0$         | Baseline level                                                      | RFU               |
| $r_1, r_2$    | Rate of growth                                                      | day <sup>-1</sup> |
| t             | Time                                                                | day               |
| $R(t)$        | Rate of gene expression                                             | RFU/day           |
| $A$           | Lumped coefficients = $\frac{E_{max} E_0 r (E_{max} - E_0)}{E_0^2}$ | -                 |
| $B$           | Lumped coefficients = $\frac{(E_{max} - E_0)}{E_0}$                 | -                 |

**Table S6.1.** Gene expression level and rate parameters

| Continuous culture type | Delay (days) | Logistic fit parameters |       |       |       | Expression rate parameters |      |       |
|-------------------------|--------------|-------------------------|-------|-------|-------|----------------------------|------|-------|
|                         |              | $E_{max}$               | $E_0$ | $r_1$ | $R^2$ | $A$                        | $B$  | $r_2$ |
| Liquid                  | 0            | 17367                   | 280   | 5     | 0.96  | 1349                       | 0.02 | -4.7  |
|                         | 2            | 9997                    | 1364  | 1     | 0.97  | 1782                       | 0.2  | -1.1  |
| Hydrogels               | 0            | 26976                   | 2036  | 2     | 0.99  | 3503                       | 0.08 | -1.6  |
|                         | 19           | 15449                   | 2573  | 1     | 0.97  | 3389                       | 0.2  | -1.1  |

**C** Instantaneous rate of gene expression

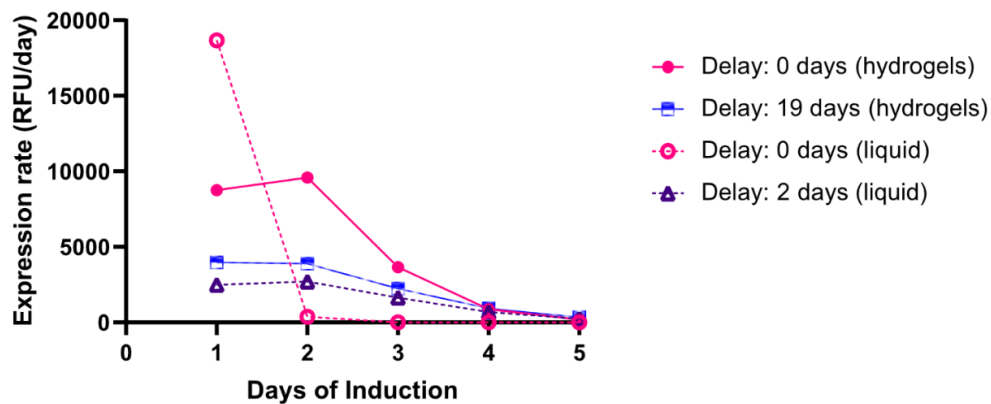

**Supplementary Figure S6.** Curve fitting for levels and rates of gene expression calculation of *E. coli* in liquid vs. hydrogels continuous cultures. **a)** Logistic equation (**Equation S6.A**) fitted to expression level data for various delays in Fig. 2, resulted in R-squared values between 0.96-0.99. **b)** Rate of gene expression (**Equation S6.B**) obtained from deriving Equation S4.A. **c)** Instantaneous rates of gene expression from Equation S4.B with parameters tabulated in **Table S6.1**.

**A** LC-MS detection of PT in engineered *E. coli* supernatant

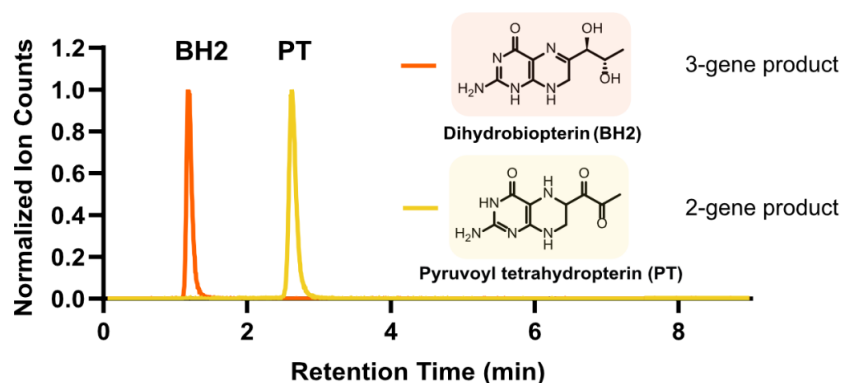

**B** Hydrogel-derived PT Level

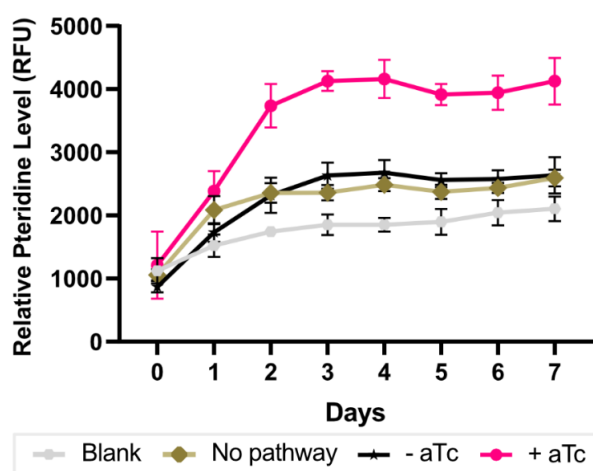

**C** LC-MS analysis on hydrogel supernatant

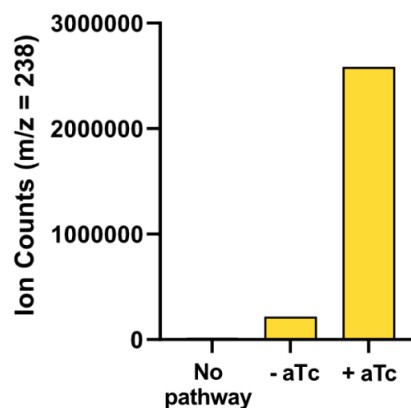

**Supplementary Figure S7.** Detection and measurement of PT fluorescence. **a)** Validation of PT production from engineered *E. coli* by LC-MS with  $m/z = 238.0935$  (see Methods). Despite having the same exact mass as dihydrobiopterin (BH<sub>2</sub>), PT has a distinct retention time (RT = 2.6 min) compared to that of BH<sub>2</sub> (RT = 1.2 min) produced in a previous work by Kiattisewee *et al.* **b)** Relative PT level measured from hydrogels using direct-gel measurement workflow. No-pathway hydrogels contained *E. coli* with an identical plasmid backbone to the pathway plasmid, but harboring no pathway genes. Values represent the mean  $\pm$  standard deviation from  $n = 4$  technical replicates. **c)** LC-MS analysis for PT from hydrogel supernatant.

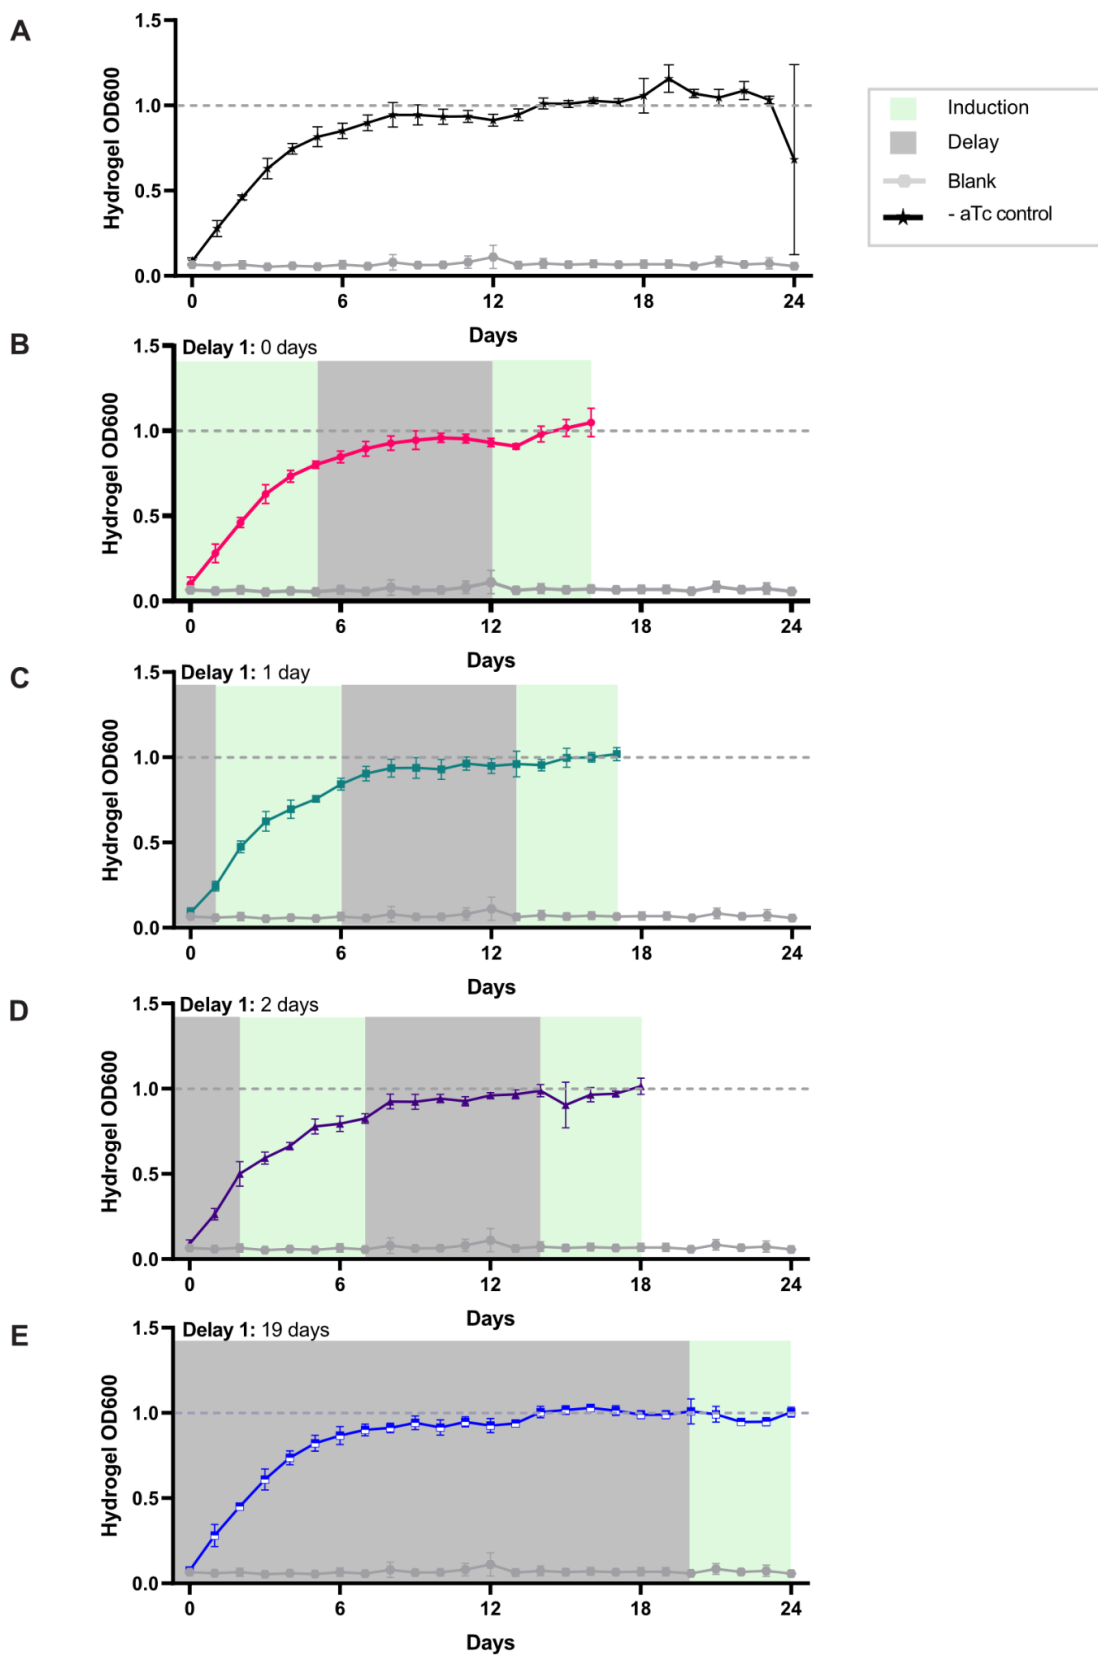

**Supplementary Figure S8.** Optical density (OD600) of *E. coli* ELMs as measured using the direct-gel measurement method corresponds to the experimental results plotted in Figures 2 and 3. **a)** Uninduced (no aTc) control **b)** ELM with no induction delay (**Delay 1:** 0 days) **c)** ELM with a 1-day induction delay (**Delay 1:** 1 days) **d)** ELM with a 2-day induction delay (**Delay 1:** 2 days) **e)** ELM with a 19-day induction delay (**Delay 1:** 19 days). The same optical density measurements for blank hydrogel samples without cells are included on all of the subplots for comparison. Values represent the mean  $\pm$  standard deviation from  $n = 5$  technical replicates, except for 19-day delay samples, where  $n = 3$  technical replicates.

**References:**

[1] D. Mumberg, R. Müller, M. Funk, Yeast vectors for the controlled expression of heterologous proteins in different genetic backgrounds, *Gene*. 156 (1995) 119–122.

[https://doi.org/10.1016/0378-1119\(95\)00037-7](https://doi.org/10.1016/0378-1119(95)00037-7).

[2] R.N. Parekh, M.R. Shaw, K.D. Wittrup, An Integrating Vector for Tunable, High Copy, Stable Integration into the Dispersed Ty  $\delta$  Sites of *Saccharomyces cerevisiae*, *Biotechnology Progress*.

12 (1996) 16–21. <https://doi.org/10.1021/bp9500627>.
